# Supplementary material for: Novel dehydropeptide-based magnetogels containing manganese ferrite nanoparticles as antitumor drug nanocarriers
Source: Royal Society of Chemistry journal article supplement (doi:10.1039/c9cp00352e), 2019-01-01
Supplement: c9cp00352e1.pdf [file c9cp00352e1.pdf]

## Novel dehydropeptide-based magnetogels containing manganese ferrite nanoparticles as antitumor drug nanocarriers

Sérgio R. S. Veloso,<sup>a</sup> Carlos A. B. Magalhães,<sup>a</sup> Ana Rita O. Rodrigues,<sup>a</sup> H. Vilaça,<sup>b</sup> Maria-João R. P. Queiroz,<sup>b</sup> J. A. Martins,<sup>b</sup> Paulo J. G. Coutinho,<sup>a</sup> Paula M. T. Ferreira,<sup>b</sup> and Elisabete M. S. Castanheira<sup>a,†</sup>

<sup>a</sup> Centro de Física (CFUM), Universidade do Minho, Campus de Gualtar, 4710-057 Braga, Portugal.

<sup>b</sup> Centro de Química (CQUM), Universidade do Minho, Campus de Gualtar, 4710-057 Braga, Portugal.

### Supplementary Information

#### 1. UV-Visible absorption spectrum of MnFe<sub>2</sub>O<sub>4</sub> nanoparticles

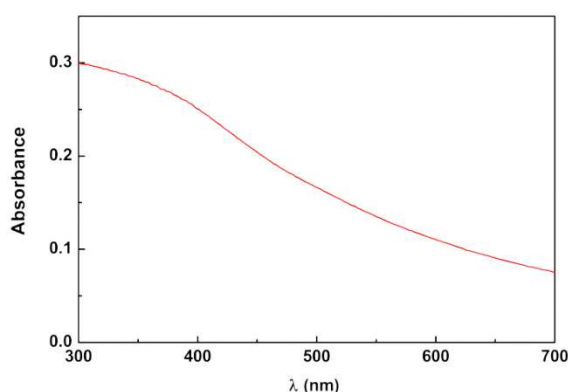

**Figure S1.** UV-visible absorption spectrum of a dilute dispersion of MnFe<sub>2</sub>O<sub>4</sub> nanoparticles in water.

#### 2. Evidence of no aggregation of the nanoparticles during gel formation

From UV-Visible absorption measurements overtime (Figure S2), it can be observed that the nanoparticles/gel dispersion takes about one hour to lose 0.02% of its initial transmittance, with no evidence of aggregation. As the hydrogels/magnetogels take in average 2-3 hours to form a stable gel, most (>90%) of the nanoparticles will remain encapsulated at the used concentration.

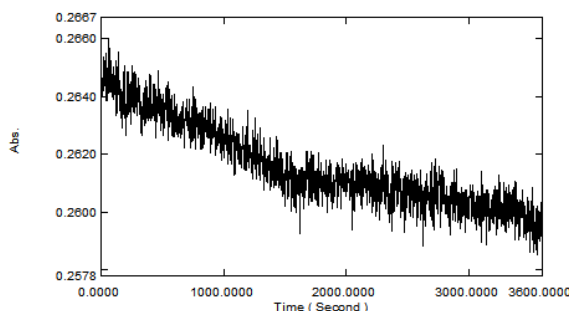

**Figure S2.** UV-visible absorption spectrum of nanoparticles/hydrogel dispersion over time.

### 3. FTIR absorption spectrum assignments of hydrogels and magnetogels

**Table S1.** Vibrational wavenumber (in  $\text{cm}^{-1}$ ) assignments according to previously reported values for naproxen and amino acids. The symbols are  $\nu$ : stretching;  $\delta$ : bending;  $\delta_{\text{o.o.p}}$ : out-of-plane bending; as: asymmetric; s: symmetric.

| Assignments                                 | Vibrational wavenumber ( $\text{cm}^{-1}$ ) |           |       |
|---------------------------------------------|---------------------------------------------|-----------|-------|
|                                             | H1                                          | H2        | H3    |
| $\nu$ C-N                                   | -                                           | 1076      | -     |
| $\delta$ C-H <sub>ring</sub>                | -                                           | 1095      | -     |
| $\nu_s$ C-O-C                               | 1030                                        | 1030      | 1030  |
| $\nu$ C <sub>ext</sub> -C <sub>ring</sub>   | -                                           | 1209      | -     |
| $\nu_{\text{as}}$ C-C-O                     | 1265                                        | 1265      | 1265  |
| $\nu_{\text{as}}$ C-C-O-H                   | 1394                                        | 1394      | 1394  |
| $\nu$ C-C                                   | 1494                                        | 1494      | 1494  |
| $\delta$ C-H                                | 1506                                        | 1506      | 1506  |
| $\nu_s$ C-C <sub>ring</sub>                 | 1604                                        | 1604      | 1604  |
| $\delta$ NH                                 | 1580                                        | 1580      | ~1577 |
| $\nu$ C-H                                   | 2850-3000                                   | 2850-3000 | -     |
| $\delta_{\text{o.o.p}}$ C-H <sub>ring</sub> | 682-750                                     | -         | -     |
| $\delta_{\text{o.o.p}}$ ring                | -                                           | 617       | -     |

The peak close to  $1580 \text{ cm}^{-1}$  is assigned to NH bending, which is followed by the vibration modes in the amide II region ( $1480 - 1575 \text{ cm}^{-1}$ ). A sharper peak observed in the magnetogels close to  $3272 \text{ cm}^{-1}$  is assigned to secondary amide N-H stretching resonance with the first amide II overtone (amide A band), which is superimposed by the broad carboxylic acid O-H dimers in the  $3100 - 3400 \text{ cm}^{-1}$  region. Considering the amide I region ( $1610 - 1695 \text{ cm}^{-1}$ ), a high absorption enhancement is observed for the amide C=O stretching at  $1641 \text{ cm}^{-1}$ , accompanied by the  $1710 \text{ cm}^{-1}$  amide C=O dimers vibration in the hydrogel **H1**. The hydrogel **H2** exhibits the most prominent C=O dimers vibrations at  $1733 \text{ cm}^{-1}$  and  $1703 \text{ cm}^{-1}$ , while **H3** shows peaks at  $1714 \text{ cm}^{-1}$  and  $1660 \text{ cm}^{-1}$ .

### 4. Spectral overlaps for FRET measurements (magnetogels/drugs)

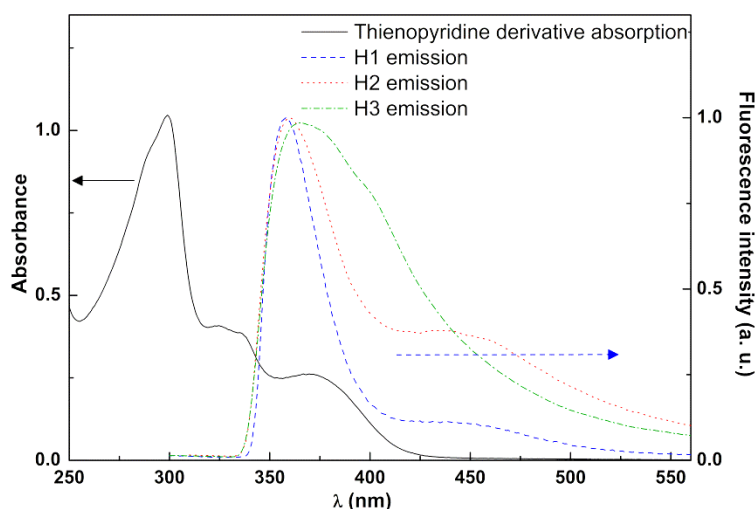

**Figure S3.** Spectral overlap (spectra are normalized) between magnetogels fluorescence emission, **H1**: Npx-L-Phe-Z-ΔAbu-OH; **H2**: Npx-L-Trp-Z-ΔPhe-OH; **H3**: Npx-L-Ala-Z-ΔPhe-Gly-L-Arg-Gly-L-Asp-Gly-OH, and thienopyridine derivative absorption.

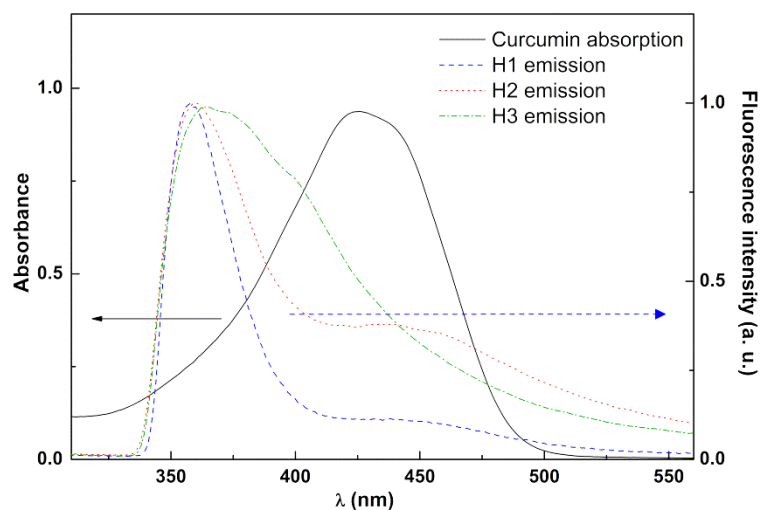

**Figure S4.** Spectral overlap (spectra are normalized) between magnetogels fluorescence emission, **H1**: Npx-*L*-Phe-Z- $\Delta$ Abu-OH; **H2**: Npx-*L*-Trp-Z- $\Delta$ Phe-OH; **H3**: Npx-*L*-Ala-Z- $\Delta$ Phe-Gly-*L*-Arg-Gly-*L*-Asp-Gly-OH, and curcumin absorption.

## 5. Excitation spectra of hydrogel H1

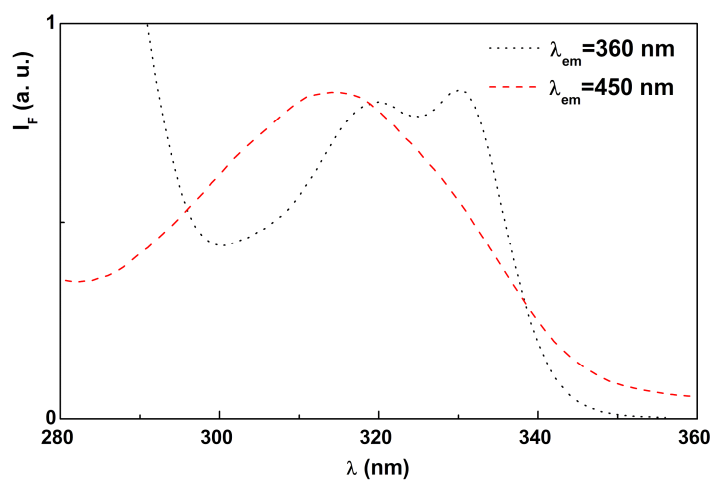

**Figure S5.** Excitation spectra of hydrogel **H1**, at two emission wavelengths: 360 nm (Npx monomer) and 450 nm (aggregate).

## 6. Spectral overlaps for FRET measurements (drugs/Nile Red)

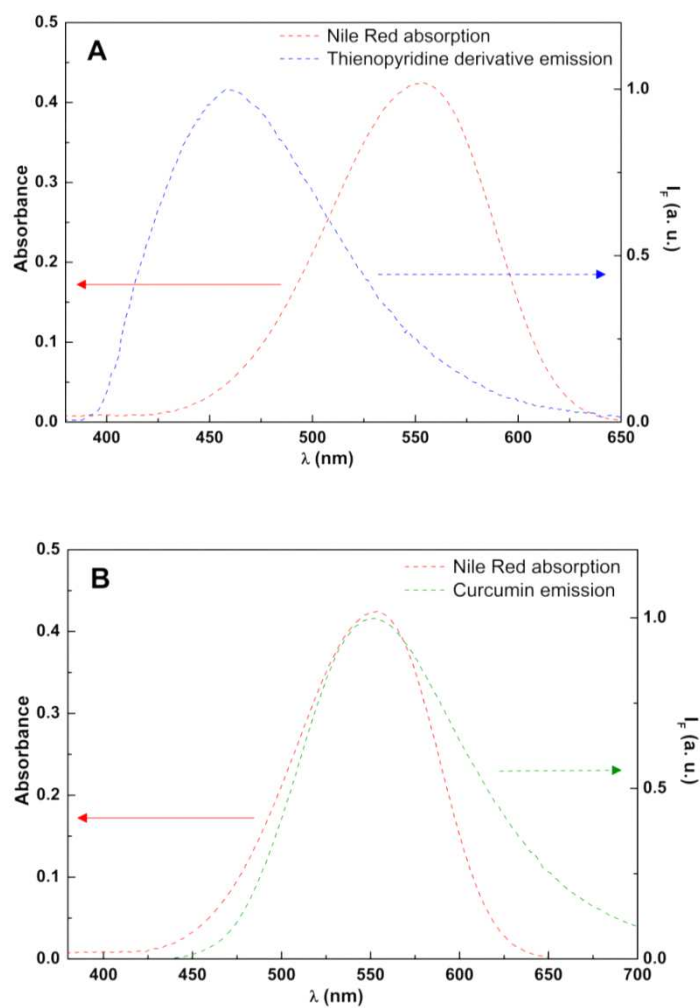

**Figure S6.** Spectral overlap (spectra are normalized) between antitumor drug emission and Nile Red absorption. **A:** Thienopyridine derivative; **B:** Curcumin.
